# Supplementary material for: Formation and spectroscopic characterization of the dioxygen adduct of a heme–Cu complex possessing a cross-linked tyrosine–histidine mimic: modeling the active site of cytochrome c oxidase
Source: Royal Society of Chemistry journal article supplement (doi:10.1039/b311538k), 2003-12-19
Supplement: b311538k.doc [file b311538k.doc]

Formation and spectroscopic characterization of the dioxygen adduct of a heme-Cu complex possessing a cross-linked tyrosine-histidine mimic: modeling the active site of cytochrome *c* oxidase

Jin-Gang Liu, Yoshinori Naruta,* Fumito Tani, Takefumi Chishiro and Yoshimitsu Tachi

Institute for Materials Chemistry and Engineering, Kyushu University, Higashi-ku, 812-8581, Fukuoka, Japan. E-mail:naruta@ms.ifoc.kyushu-u.ac.jp; Fax: +81 (0)92-642-2715; Tel: +81 (0)92-642-2731; E-mail: naruta@ms.ifoc.kyushu-u.ac.jp

## General

Preparation and handling of air sensitive materials were carried out under N2 in a glove-box (M. Braun 150B-G-II) equipped with a circulating purifier (O2, H2O < 1 ppm). Chloroform was distilled over K2CO3. Dryreagents were purified under N**2** atmosphere by the procedure described below. Tetrahydrofuran (THF) was pre-dried over KOH and distilled from Na/benzophenone. Dichloromathane (CH2Cl2) was stirred with concentrated H2SO4 for several days and dried over K2CO3, and then distilled from CaH2. Acetonitrile (CH3CN) was distilled twice from P2O5 and redistilled from K2CO3. Dry acetonitrile for spectroscopic measurements was further purified as follows. The dry acetonitrile was degassed three times by freeze-thaw method, and was stirred over KO2 (Aldrich) for ca. 1 h and then passed through activated alumina (Wako) which was dried in prior at 220 C under vacuum for 10 h. Subsequently, it was degassed three times by freeze-thaw technique again. The other degassed solvents were treated by freeze-thaw method.

## Instruments and Methods

1H NMR spectra were recorded on a JEOL LMX-GX 400 (400 MHz) spectrometer. Chemical shift was referenced to the residual solvent signal. Electrospray ionization mass (ESI-MS) spectra were obtained on a Perkin-Elmer Sciex API-300 mass spectrometer. Scanning was in 0.1-dalton steps and a 10-ms dwell time per step. The orifice voltage was controlled from -20 to +100 V, dependent on the intensity of TIC. High-resolution mass (HR-MS) spectra were recorded on a JEOL LMS-HX-110 spectrometer with 3-nitrobenzyl alcohol (NBA) as a matrix. The UV-Vis electronic spectra were recorded on a Hamamatsu PMA-11 CCD spectrophotometer with a Photal MC-2530 (D2/W2) as a light source. The temperature was controlled by a NESLAB ULT-95 low temperature circulator. Infrared spectra were recorded on a BIO-RAD FTS-6000 spectrometer. ESR spectra were obtained at 77 K in 5.0 mm diameter ESR quartz tubes on a JEOL JES-TE 300 spectrometer. The magnetic field was calibrated by the hyperfine coupling constants (hfcc) of Mn(II) ion doped in MgO powder (86.9 Guass).

Resonance Raman spectra were obtained on a SpectraPro-300I spectrometer (Acton Research) with a 2400-groove grating, a Beamlok 2060 Kr ion laser (Spectra-physics), a holographic Supernotch filter (Kaiser Optical Systems), and LN-1100PB CCD detector (Princeton Instruments) cooled with liquid N2. Spectra were collected in spinning cells (2.0 cm diameter, 1500 rpm) at -30 C at an excitation wavelength ex = 413.1 nm (50 mW), 90 scattering geometry, and 5-min data accumulation. Peak frequencies were calibrated relative to indene and CCl4 standards (accurate to 1 cm-1). During each Raman experiment, UV/vis spectra were simultaneously collected on a PMA-11 CCD spectrophotometer (Hamamatsu) with a Photal MC-2530 (D2/W2) light source (Otsuka Electronic Co.).

## Synthesis of Metal Porphyrins

**FeIILOMOM**

To a solution of free base porphyrin (LOMOM, 12.2 mg, 10  mol)in deoxygenated THF (15 mL) at reflux was added FeBr**2** (10.8 mg, 50  mol), and heating was continued for 3 h. The volume was reduced to ca. 5 mL and the solution diluted with 10 mL toluene. Aqueous EDTA solution (0.1 M, 6 mL) was added and the mixture was stirred for 10 min. The organic phase was separated and washed with deoxygenated water (20 mL). The solvent was evaporated under vacuum, and the residue was dried for 12 h under continuous high vacuum to afford the Fe(II) porphyrin in 95% yield. ESI-MS: *m/z* = 1268.6 [*M*+H]+. Calcd for C78H73FeN11O3: [*M*+H]+, 1268.5. UV-vis (CH3CN) max(M1cm1) = 429 (83500), 533 (11500), 568 (4500), 611 nm (1780).

**FeIILOH**

Prepared in the similar way as described for FeIILOMOM (Yield: 94%). ESI-MS: *m/z* = 1224.6 [*M*+H]+, Calcd for C76H69FeN11O2: [*M*+H]+, 1224.5. UV-vis (CH3CN) max(M1cm1) = 429 (82500), 533 (10000), 569 (4500), 612 nm (195).

**[CuIFeIILOMOM] CF3SO3-** (**9**)

To FeIILOMOM in degassed CH3CN was added a degassed CH3CN solution of an equimolar amount of [Cu(CH3CN)4]+CF3SO3**-** by a micro-syringe and the solution was stripped to dryness after 15 min. The resultant solid was then dried under high vacuum. ESI-MS: *m/z* = 1330.5 [*M* - CF3SO3- ]**+**, Calcd for C78H73CuFeN11O3: [*M* - CF3SO3**-** ]**+**, 1330.5. UV-vis (CH3CN) max(M1cm1) = 429 (82500), 533 (10850), 568 (4400), 611 nm (1680).

**[CuIFeIILOH] CF3SO3-** (**10**)

Prepared in the similar way as described for **9**. ESI-MS: *m/z* = 1286.5 [*M* - CF**3**SO**3-** ]**+**, Calcd for C76H69CuFeN11O2: [*M* - CF3SO3- ]**+**, 1286.4. UV-vis (CH3CN) max(M-1cm-1) = 429 (82500), 533 (9700), 569 (4000), 612 nm (1900).

## Oxygenation Reaction

To a degassed acetonitrile solution of **10** (1.0  10-4 mol/L) in a 0.2-cm quartz cuvett at -30 C, dry O**2** gas through molecular sieves was introduced into the solution with O**2** line. Its spectral change was monitored by an UV-vis spectrometer. Preparation of samples for ESI-MS was carried out in the same way, and the resonance Raman spectral measurement was performed with a cylindrical Raman cell into which 10 mL of O**2** gas was injected with a syringe.
